# Supplementary material for: Colloidal Au sphere and nanoflower-based immunochromatographic strips for sensitive detection of zearalenone in cereals
Source: Royal Society of Chemistry journal article supplement (doi:10.1039/d2ay01365g), 2022-01-01
Supplement: d2ay01365g1.pdf [file d2ay01365g1.pdf]

***Supplementary Materials for***  
**Colloidal Au Spheres and Nanoflowers-Based**  
**Immunochromatographic Strip for Sensitive Detection of**  
**Zearalenone in Cereals**

**Weili Qiao <sup>a</sup>, Baoshan He <sup>a,\*</sup>, Wenjie Ren <sup>a</sup>, Renyong Zhao <sup>a,\*\*</sup>, Zhiguang Suo <sup>a</sup>,  
Haoyang Yan <sup>b</sup>, Yiwei Xu <sup>a</sup>, Min Wei <sup>a</sup>, Huali Jin <sup>a</sup>**

*<sup>a</sup> School of Food Science and Technology, Henan University of Technology, Zhengzhou,  
Henan 450001, P. R. China*

*<sup>b</sup> School of International Education, Henan University of Technology, Zhengzhou, Henan  
450001, P. R. China*

\* Corresponding author. Tel.: +86 371 67758022; Fax: +86 371 67758022

E-mail addresss: hebaoshan@126.com

\*\*Corresponding author. Tel.: +86 371 67758036; Fax: +86 371 67758036

E-mail addresss: [zry8600@126.com](mailto:zry8600@126.com)

## Calculation of RSD and LOD

The relative standard deviation (RSD) comes from the result of dividing the average value ( $\bar{x}$ ) by the standard deviation (SD), and its formula is as follows:

$$\text{RSD} = \text{SD} / \bar{x}$$

The following is the original data table and the RSD calculated based on the original data and formula:

**Table S1.** Original data for RSD Calculation

|                    | SD   | $\bar{x}$ | RSD   |
|--------------------|------|-----------|-------|
|                    | 1.30 | 76.63     | 1.69% |
| <b>Real sample</b> | 0.64 | 29.75     | 2.16% |
|                    | 0.28 | 8.45      | 3.28% |

## Calculation of LOD

The calibration equation was determined to be  $y = A_2 + (A_1 - A_2) / [1 + (x/x_0)^p]$ .

For AuNFs-ICS,  $A_1 = 114.2646$ ,  $A_2 = -3.73737$ ,  $X_0 = 0.55731$ ,  $p = 0.69537$ .  $y = 90.00$ .

For AuSPs-ICS,  $A_1 = 93.08247$ ,  $A_2 = 8.35071$ ,  $X_0 = 1.62614$ ,  $p = 1.56982$ .  $y = 90.00$ .

The LODs were calculated based on the above data and formula.
